# Supplementary material for: Quality Assessment of Surgical Disc Samples Discriminates Human Annulus Fibrosus and Nucleus Pulposus on Tissue and Molecular Level
Source: MDPI journal article supplement (doi:10.3390/ijms19061761), 2018-06-13
Supplement: s1 [file s1]

**Supplement Table S3.** Microarray data of previously identified disc-related genes. Gene titles are shown as in array annotations (common alias in brackets). Sorting in each category according to fold change (FC) AF/NP. FC is presented as mean ± SD of all comparisons AF/NP array data with respective p-value (mean). Change% describes the up- and down-regulation in AF tissue and is shown as percentage of all comparisons AF/NP. Signal detection is shown as percentage presence (detection%) in the corresponding tissue, AF or NP, and as absolute mean signal value of all AF or NP arrays. Array data were obtained from n=11 AF and n=9 NP samples. AF - annulus fibrosus. NP - nucleus pulposus. Genes are highlighted in bold, when this gene was differentially expressed (FC at least 2 and change >80%) and regulation was in line with literature.

| Gene Title                                                            | Gene Symbol     | FC AF/NP<br>mean ± SD | p-value<br>mean | change% in AF<br>up down |           | detection%<br>AF NP |            | signal mean<br>AF NP |             |
|-----------------------------------------------------------------------|-----------------|-----------------------|-----------------|--------------------------|-----------|---------------------|------------|----------------------|-------------|
| Genes previously reported with higher expression in NP compared to AF |                 |                       |                 |                          |           |                     |            |                      |             |
| <i>human disc</i>                                                     |                 |                       |                 |                          |           |                     |            |                      |             |
| C-type lectin domain family 2, member B                               | CLEC2B          | 4,0 ± 2,6             | 0,095           | 86                       | 4         | 100                 | 100        | 375                  | 115         |
| alpha-2-macroglobulin                                                 | A2M             | 2,2 ± 2,3             | 0,193           | 72                       | 9         | 100                 | 100        | 2562                 | 1595        |
| cadherin 2, type 1, N-cadherin                                        | CDH2            | 1,5 ± 3,3             | 0,466           | 24                       | 10        | 45                  | 22         | 86                   | 58          |
| carbonic anhydrase XII                                                | CA12            | 1,4 ± 1,6             | 0,256           | 21                       | 1         | 82                  | 56         | 129                  | 85          |
| TYRO3 protein tyrosine kinase                                         | TYRO3           | -1,5 ± 0,7            | 0,193           | 1                        | 39        | 0                   | 22         | 58                   | 86          |
| neural cell adhesion molecule 1                                       | NCAM1           | -1,5 ± 0,3            | 0,336           | 0                        | 1         | 0                   | 0          | 12                   | 16          |
| <b>desmocollin 2</b>                                                  | <b>DSC2</b>     | <b>-2,5 ± 0,5</b>     | <b>0,081</b>    | <b>3</b>                 | <b>81</b> | <b>100</b>          | <b>100</b> | <b>143</b>           | <b>311</b>  |
| sarcoglycan, gamma                                                    | SGCG            | -2,5 ± 0,3            | 0,179           | 6                        | 69        | 27                  | 78         | 28                   | 82          |
| <i>non-human disc</i>                                                 |                 |                       |                 |                          |           |                     |            |                      |             |
| sclerostin domain containing 1                                        | SOSTDC1         | 3,8 ± 4,1             | 0,188           | 6                        | 0         | 0                   | 0          | 14                   | 3           |
| CD24 molecule                                                         | CD24            | 2,8 ± 2,3             | 0,111           | 81                       | 6         | 100                 | 100        | 643                  | 250         |
| keratin 18                                                            | KRT18           | 1,2 ± 1,2             | 0,226           | 6                        | 1         | 100                 | 89         | 163                  | 133         |
| keratin 8                                                             | KRT8            | -1,0 ± 0,7            | 0,435           | 0                        | 2         | 91                  | 56         | 44                   | 49          |
| keratin 19                                                            | KRT19           | -1,0 ± 0,7            | 0,544           | 0                        | 1         | 0                   | 0          | 2                    | 2           |
| versican                                                              | VCAN            | -1,4 ± 0,7            | 0,186           | 5                        | 60        | 100                 | 100        | 3024                 | 4483        |
| solute carrier family 2, member 1 (GLUT-1)                            | SLC2A1          | -1,6 ± 0,7            | 0,119           | 2                        | 73        | 100                 | 100        | 194                  | 304         |
| Genes previously reported with higher expression in AF compared to NP |                 |                       |                 |                          |           |                     |            |                      |             |
| <i>human disc</i>                                                     |                 |                       |                 |                          |           |                     |            |                      |             |
| <b>SPARC-like 1 (hevin)</b>                                           | <b>SPARCL1</b>  | <b>33,6 ± 4,9</b>     | <b>0,084</b>    | <b>91</b>                | <b>6</b>  | <b>100</b>          | <b>89</b>  | <b>4263</b>          | <b>91</b>   |
| nuclear factor of activated T-cells, cytoplasmic, 4                   | NFATC4          | 1,9 ± 2,1             | 0,114           | 41                       | 0         | 45                  | 11         | 91                   | 51          |
| <i>non-human disc</i>                                                 |                 |                       |                 |                          |           |                     |            |                      |             |
| <b>secreted frizzled-related protein 2</b>                            | <b>SFRP2</b>    | <b>27,2 ± 9,8</b>     | <b>0,118</b>    | <b>82</b>                | <b>9</b>  | <b>82</b>           | <b>44</b>  | <b>1457</b>          | <b>50</b>   |
| <b>serpin peptidase inhibitor, clade F, member 1</b>                  | <b>SERPINF1</b> | <b>15,2 ± 2,9</b>     | <b>0,029</b>    | <b>94</b>                | <b>2</b>  | <b>91</b>           | <b>33</b>  | <b>1477</b>          | <b>81</b>   |
| tenomodulin                                                           | TNMD            | 7,6 ± 5,8             | 0,142           | 53                       | 0         | 64                  | 0          | 88                   | 5           |
| regulator of G-protein signaling 5                                    | RGS5            | 7,5 ± 3,2             | 0,034           | 66                       | 0         | 82                  | 0          | 406                  | 20          |
| keratocan                                                             | KERA            | 3,2 ± 2,0             | 0,035           | 79                       | 0         | 100                 | 33         | 95                   | 23          |
| <b>collagen, type XII, alpha 1</b>                                    | <b>COL12A1</b>  | <b>3,1 ± 2,4</b>      | <b>0,112</b>    | <b>85</b>                | <b>8</b>  | <b>100</b>          | <b>100</b> | <b>3138</b>          | <b>1059</b> |

|                                                              |          |            |       |    |    |     |     |       |       |
|--------------------------------------------------------------|----------|------------|-------|----|----|-----|-----|-------|-------|
| myosin, heavy chain 11, smooth muscle                        | MYH11    | 2,7 ± 3,8  | 0,278 | 21 | 0  | 36  | 0   | 36    | 12    |
| ADAM metallopeptidase with thrombospondin type 1 motif 17    | ADAMTS17 | -1,2 ± 0,6 | 0,409 | 12 | 28 | 100 | 100 | 120   | 151   |
| collagen, type V, alpha 1                                    | COL5A1   | -1,4 ± 0,6 | 0,297 | 17 | 55 | 100 | 100 | 2392  | 2852  |
| <b>Other genes related to the disc</b>                       |          |            |       |    |    |     |     |       |       |
| collagen type I                                              | COL1A1   | 3,8 ± 3,6  | 0,184 | 67 | 11 | 100 | 100 | 1645  | 390   |
| hemoglobin, beta                                             | HBB      | 2,3 ± 2,7  | 0,283 | 57 | 11 | 100 | 100 | 10560 | 6670  |
| thrombospondin 2 (TSP-2)                                     | THBS2    | 1,8 ± 1,6  | 0,122 | 67 | 4  | 100 | 100 | 2468  | 1490  |
| decorin                                                      | DCN      | -1,1 ± 0,8 | 0,307 | 9  | 34 | 100 | 100 | 11028 | 12611 |
| biglycan                                                     | BGN      | -1,1 ± 0,8 | 0,349 | 6  | 28 | 100 | 100 | 3886  | 4448  |
| fibromodulin                                                 | FMOD     | -1,1 ± 0,8 | 0,306 | 3  | 39 | 100 | 100 | 9649  | 11057 |
| hypoxia inducible factor 1, alpha subunit                    | HIF1A    | -1,1 ± 0,8 | 0,285 | 0  | 38 | 100 | 100 | 6217  | 7092  |
| collagen type II                                             | COL2A1   | -1,2 ± 0,7 | 0,358 | 15 | 43 | 100 | 100 | 6346  | 7342  |
| aggrecan                                                     | ACAN     | -1,2 ± 0,6 | 0,434 | 26 | 42 | 100 | 100 | 5451  | 6291  |
| forkhead box F1                                              | FOXF1    | -1,2 ± 0,7 | 0,317 | 9  | 29 | 100 | 100 | 550   | 641   |
| ovostatin 2                                                  | OVOS2    | -1,4 ± 0,5 | 0,328 | 21 | 47 | 100 | 100 | 272   | 350   |
| proteoglycan 4                                               | PRG4     | -1,7 ± 0,7 | 0,072 | 1  | 79 | 100 | 100 | 7113  | 12012 |
| paired box 1                                                 | PAX1     | -1,9 ± 0,7 | 0,059 | 0  | 77 | 100 | 100 | 297   | 534   |
| <b>Genes related to disc development or progenitor cells</b> |          |            |       |    |    |     |     |       |       |
| TEK tyrosine kinase, endothelial (Tie2)                      | TEK      | 13,5 ± 4,0 | 0,048 | 89 | 0  | 91  | 0   | 157   | 8     |
| sonic hedgehog                                               | SHH      | 1,1 ± 3,4  | 0,498 | 0  | 0  | 0   | 0   | 13    | 12    |
| T, brachyury homolog                                         | T        | -1,1 ± 0,5 | 0,536 | 0  | 2  | 0   | 0   | 7     | 9     |
