# Supplementary material for: Quality Assessment of Surgical Disc Samples Discriminates Human Annulus Fibrosus and Nucleus Pulposus on Tissue and Molecular Level
Source: MDPI journal article supplement (doi:10.3390/ijms19061761), 2018-06-13
Supplement: s1 [file s1]

**Supplement Table S2.** Microarray data of 52 genes up-regulated in nucleus pulposus (NP) compared to annulus fibrosus (AF). Data from all differently expressed genes with fold-change (FC) AF/NP <-2 and change% >80%. Sorting according to FC AF/NP. FC is presented as mean  $\pm$  SD of all comparisons AF/NP array data with respective p-value (mean). Signal detection is shown as percentage presence (detection%) in the corresponding tissue, AF or NP, and as absolute mean signal value of all AF or NP arrays. Data was obtained from n=11 AF and n=9 NP samples. Gene titles are shown as in annotations of microarray. \*actual official NCBI gene symbol and title, old symbol of array annotations is noted in brackets. \*\*more than 2 different gene titles and gene symbols, for all gene titles and symbols see array annotations. /// separates different gene titles and gene symbols for the same gene ID. Selected NP markers for qPCR are highlighted in bold.

| Gene Title                                                                                  | Gene Symbol*                       | Gene ID            | FC AF/NP                          | p-value      | detection% |            | signal mean |             |
|---------------------------------------------------------------------------------------------|------------------------------------|--------------------|-----------------------------------|--------------|------------|------------|-------------|-------------|
|                                                                                             |                                    |                    | mean $\pm$ SD                     | mean         | AF         | NP         | AF          | NP          |
| SRY (sex determining region Y)-box 11                                                       | SOX11                              | 204914_s_at        | - 5,2 $\pm$ 0,4                   | 0,052        | 91         | 100        | 193         | 765         |
| <b>serine palmitoyltransferase, long chain base subunit 3</b>                               | <b>SPTLC3</b>                      | <b>227752_at</b>   | - <b>4,7 <math>\pm</math> 0,5</b> | <b>0,028</b> | <b>100</b> | <b>100</b> | <b>91</b>   | <b>427</b>  |
| <b>defensin, beta 1</b>                                                                     | <b>DEFB1</b>                       | <b>210397_at</b>   | - <b>4,6 <math>\pm</math> 0,4</b> | <b>0,077</b> | <b>100</b> | <b>100</b> | <b>434</b>  | <b>1551</b> |
| <b>desmocollin 3</b>                                                                        | <b>DSC3</b>                        | <b>206033_s_at</b> | - <b>4,4 <math>\pm</math> 0,5</b> | <b>0,037</b> | <b>36</b>  | <b>100</b> | <b>19</b>   | <b>101</b>  |
| <b>erythroferrone</b>                                                                       | <b>ERFE* (FAM132B)</b>             | <b>229622_at</b>   | - <b>3,9 <math>\pm</math> 0,4</b> | <b>0,039</b> | <b>91</b>  | <b>100</b> | <b>234</b>  | <b>706</b>  |
| solute carrier family 7 (anionic amino acid transporter light chain, xc- system), member 11 | SLC7A11                            | 209921_at          | - 3,8 $\pm$ 0,4                   | 0,073        | 100        | 100        | 111         | 315         |
| phosphoserine aminotransferase 1                                                            | PSAT1                              | 223062_s_at        | - 3,6 $\pm$ 0,5                   | 0,050        | 100        | 100        | 349         | 1075        |
| uncharacterised LOC100652811 /// LOC100653083...**                                          | LOC100652811 /// LOC100653083...** | 1553797_a_at       | - 3,5 $\pm$ 0,5                   | 0,029        | 100        | 100        | 202         | 562         |
| <b>ArfGAP with RhoGAP domain, ankyrin repeat and PH domain 2</b>                            | <b>ARAP2</b>                       | <b>213618_at</b>   | - <b>3,4 <math>\pm</math> 0,4</b> | <b>0,083</b> | <b>100</b> | <b>100</b> | <b>115</b>  | <b>362</b>  |
| WDNM1-like pseudogene                                                                       | LOC645638                          | 229566_at          | - 3,3 $\pm$ 0,4                   | 0,050        | 45         | 100        | 131         | 345         |
| zinc finger protein 280B                                                                    | ZNF280B                            | 230789_at          | - 3,3 $\pm$ 0,5                   | 0,070        | 45         | 100        | 31          | 107         |
| family with sequence similarity 110, member C                                               | FAM110C                            | 226863_at          | - 3,3 $\pm$ 0,5                   | 0,033        | 100        | 100        | 171         | 489         |
| attractin-like 1                                                                            | ATRNL1                             | 213745_at          | - 3,2 $\pm$ 0,5                   | 0,096        | 100        | 100        | 209         | 521         |
| fibronectin 1                                                                               | FN1                                | 214701_s_at        | - 3,2 $\pm$ 0,5                   | 0,081        | 100        | 100        | 780         | 2098        |
| <b>cyclin-dependent kinase inhibitor 2B (p15, inhibits CDK4)</b>                            | <b>CDKN2B</b>                      | <b>236313_at</b>   | - <b>3,1 <math>\pm</math> 0,7</b> | <b>0,000</b> | <b>100</b> | <b>100</b> | <b>50</b>   | <b>163</b>  |
| gamma-aminobutyric acid (GABA) B receptor, 2                                                | GABBR2                             | 209990_s_at        | - 3,0 $\pm$ 0,4                   | 0,056        | 64         | 100        | 34          | 126         |
| cytokine receptor-like factor 1                                                             | CRLF1                              | 206315_at          | - 2,9 $\pm$ 0,5                   | 0,071        | 100        | 100        | 528         | 1373        |
| tumor suppressor candidate 3                                                                | TUSC3                              | 213423_x_at        | - 2,9 $\pm$ 0,6                   | 0,013        | 100        | 100        | 425         | 1164        |
| UL16 binding protein 2                                                                      | ULBP2                              | 238542_at          | - 2,9 $\pm$ 0,5                   | 0,029        | 91         | 100        | 154         | 366         |
| SPARC related modular calcium binding 1                                                     | SMOC1                              | 222783_s_at        | - 2,8 $\pm$ 0,5                   | 0,072        | 100        | 100        | 339         | 760         |
| brain and acute leukemia, cytoplasmic                                                       | BAALC                              | 218899_s_at        | - 2,8 $\pm$ 0,5                   | 0,088        | 100        | 100        | 733         | 1686        |
| ATPase, Na <sup>+</sup> /K <sup>+</sup> transporting, beta 1 polypeptide                    | ATP1B1                             | 201242_s_at        | - 2,8 $\pm$ 0,5                   | 0,046        | 100        | 100        | 634         | 1528        |
| SLIT and NTRK-like family, member 4                                                         | SLITRK4                            | 232636_at          | - 2,8 $\pm$ 0,6                   | 0,042        | 100        | 100        | 181         | 484         |
| calcyphosine                                                                                | CAPS                               | 231729_s_at        | - 2,7 $\pm$ 0,6                   | 0,028        | 100        | 100        | 225         | 586         |
| STEAP family member 3, metalloredutase                                                      | STEAP3                             | 1554830_a_at       | - 2,7 $\pm$ 0,5                   | 0,080        | 100        | 100        | 92          | 223         |
| protein phosphatase 1, regulatory (inhibitor) subunit 14C                                   | PPP1R14C                           | 226907_at          | - 2,6 $\pm$ 0,5                   | 0,089        | 100        | 100        | 362         | 861         |
| cadherin 19, type 2                                                                         | CDH19                              | 206898_at          | - 2,6 $\pm$ 0,6                   | 0,021        | 100        | 100        | 729         | 1827        |
| desmoglein 2                                                                                | DSG2                               | 217901_at          | - 2,5 $\pm$ 0,6                   | 0,019        | 100        | 100        | 740         | 1756        |
| tumor necrosis factor, alpha-induced protein 6                                              | TNFAIP6                            | 206026_s_at        | - 2,5 $\pm$ 0,5                   | 0,087        | 100        | 100        | 3483        | 7615        |
| desmocollin 2                                                                               | DSC2                               | 226817_at          | - 2,5 $\pm$ 0,5                   | 0,081        | 100        | 100        | 143         | 311         |

|                                                                                                         |                          |             |             |       |     |     |      |      |
|---------------------------------------------------------------------------------------------------------|--------------------------|-------------|-------------|-------|-----|-----|------|------|
| ADAM metallopeptidase with thrombospondin type 1 motif, 6 family with sequence similarity 167, member A | ADAMTS6                  | 237411_at   | - 2,4 ± 0,6 | 0,064 | 100 | 100 | 670  | 1569 |
| H19, imprinted maternally expressed transcript (non-protein coding) /// microRNA 675                    | FAM167A                  | 226614_s_at | - 2,4 ± 0,6 | 0,075 | 100 | 100 | 78   | 172  |
| UDP-N-acetyl-alpha-D-galactosamine:polypeptide N-acetylglactosaminyltransferase 7 (GalNAc-T7)           | H19 /// MIR675           | 224997_x_at | - 2,4 ± 0,6 | 0,059 | 100 | 100 | 370  | 846  |
| DnaJ (Hsp40) homolog, subfamily C, member 12                                                            | GALNT7                   | 222587_s_at | - 2,3 ± 0,6 | 0,039 | 100 | 100 | 230  | 534  |
| uncharacterised LOC100289058                                                                            | DNAJC12                  | 223721_s_at | - 2,3 ± 0,6 | 0,040 | 100 | 100 | 71   | 164  |
| coiled-coil domain containing 80                                                                        | LOC100289058             | 1563077_at  | - 2,2 ± 0,6 | 0,080 | 100 | 100 | 260  | 594  |
| retinoic acid receptor, beta                                                                            | CCDC80                   | 243864_at   | - 2,2 ± 0,6 | 0,082 | 100 | 100 | 391  | 768  |
| melanoma antigen family D, 4 /// melanoma antigen family D, 4B... **                                    | RARB                     | 205080_at   | - 2,2 ± 0,6 | 0,066 | 100 | 100 | 455  | 1065 |
| long intergenic non-protein coding RNA 86 /// long intergenic non-protein coding RNA 87                 | MAGED4 /// MAGED4B... ** | 221261_x_at | - 2,2 ± 0,6 | 0,056 | 100 | 100 | 147  | 299  |
| delta/notch-like EGF repeat containing dermatopontin                                                    | LINC00086 /// LINC00087  | 227909_at   | - 2,1 ± 0,5 | 0,110 | 100 | 100 | 695  | 1350 |
| receptor tyrosine kinase-like orphan receptor 1                                                         | DNER                     | 226281_at   | - 2,1 ± 0,5 | 0,090 | 100 | 100 | 3059 | 5751 |
| isthmin 1 homolog (zebrafish)                                                                           | DPT                      | 207977_s_at | - 2,1 ± 0,6 | 0,096 | 100 | 100 | 1168 | 2400 |
| WNT1 inducible signaling pathway protein 3                                                              | ROR1                     | 232060_at   | - 2,1 ± 0,6 | 0,076 | 100 | 100 | 296  | 569  |
| phospholipase A2, group IVA (cytosolic, calcium-dependent)                                              | ISM1                     | 235182_at   | - 2,1 ± 0,6 | 0,027 | 100 | 100 | 1784 | 3579 |
| fibronectin type III domain containing 3B                                                               | WISP3                    | 210861_s_at | - 2,1 ± 0,6 | 0,066 | 100 | 100 | 597  | 1267 |
| immunoglobulin superfamily, member 3                                                                    | PLA2G4A                  | 210145_at   | - 2,1 ± 0,6 | 0,066 | 100 | 100 | 998  | 2127 |
| asparagine synthetase (glutamine-hydrolyzing)                                                           | FND3C3B                  | 222693_at   | - 2,1 ± 0,7 | 0,047 | 100 | 100 | 350  | 679  |
| mucolipin 3                                                                                             | IGSF3                    | 202421_at   | - 2,1 ± 0,7 | 0,014 | 100 | 100 | 245  | 513  |
| ligand of numb-protein X 1, E3 ubiquitin protein ligase                                                 | ASNS                     | 205047_s_at | - 2,1 ± 0,6 | 0,056 | 100 | 100 | 317  | 667  |
| potassium voltage-gated channel, KQT-like subfamily, member 5                                           | MCOLN3                   | 220484_at   | - 2,0 ± 0,6 | 0,089 | 100 | 100 | 183  | 330  |
|                                                                                                         | LNK1                     | 223611_s_at | - 2,0 ± 0,7 | 0,075 | 100 | 100 | 615  | 1179 |
|                                                                                                         | KCNQ5                    | 244623_at   | - 2,0 ± 0,6 | 0,075 | 100 | 100 | 457  | 911  |
