# Supplementary material for: Quality Assessment of Surgical Disc Samples Discriminates Human Annulus Fibrosus and Nucleus Pulposus on Tissue and Molecular Level
Source: MDPI journal article supplement (doi:10.3390/ijms19061761), 2018-06-13
Supplement: s1 [file s1]

**Supplement Table S1.** Microarray data of 267 genes up-regulated in annulus fibrosus (AF) compared to nucleus pulposus (NP). Data from all differently expressed genes with fold-change (FC) AF/NP >2 and change% >80%. Sorting according to FC AF/NP. FC is presented as mean  $\pm$  SD of all comparisons AF/NP array data with respective p-value (mean). Signal detection is shown as percentage presence (detection%) in the corresponding tissue, AF or NP, and as absolute mean signal value of all AF or NP arrays. Data was obtained from n=11 AF and n=9 NP samples. Gene titles are shown as in annotations of microarray. \*actual official NCBI gene symbol and title, old symbol of array annotations is noted in brackets. \*\*more than 2 different gene titles and gene symbols, for all gene titles and symbols see array annotations. /// separates different gene titles and gene symbols for the same gene ID. Selected markers for qPCR are highlighted in bold.

| Gene Title                                                          | Gene Symbol    | Gene ID            | FC AF/NP                          | p-value      | detection% |          | Signal mean |           |
|---------------------------------------------------------------------|----------------|--------------------|-----------------------------------|--------------|------------|----------|-------------|-----------|
|                                                                     |                |                    | mean $\pm$ SD                     | mean         | AF         | NP       | AF          | NP        |
| <b>LIM domain binding 2</b>                                         | <b>LDB2</b>    | <b>206481_s_at</b> | <b>124,7 <math>\pm</math> 7,5</b> | <b>0,046</b> | <b>91</b>  | <b>0</b> | <b>418</b>  | <b>2</b>  |
| selectin E                                                          | SELE           | 206211_at          | 83,6 $\pm$ 9,0                    | 0,055        | 82         | 0        | 376         | 2         |
| <b>adhesion G protein-coupled receptor L4</b>                       | <b>ADGRL4*</b> | <b>219134_at</b>   | <b>73,8 <math>\pm</math> 6,7</b>  | <b>0,025</b> | <b>91</b>  | <b>0</b> | <b>422</b>  | <b>5</b>  |
|                                                                     | <b>(ELTD1)</b> |                    |                                   |              |            |          |             |           |
| guanylate cyclase 1, soluble, alpha 3                               | GUCY1A3        | 227235_at          | 63,8 $\pm$ 7,4                    | 0,020        | 82         | 0        | 316         | 5         |
| myc target 1                                                        | MYCT1          | 231947_at          | 59,5 $\pm$ 4,9                    | 0,021        | 91         | 0        | 310         | 4         |
| complement component 7                                              | C7             | 202992_at          | 41,3 $\pm$ 5,7                    | 0,049        | 82         | 0        | 424         | 3         |
| CD36 molecule (thrombospondin receptor)                             | CD36           | 206488_s_at        | 40,9 $\pm$ 6,9                    | 0,038        | 100        | 11       | 268         | 24        |
| G protein-coupled receptor 116                                      | GPR116         | 212951_at          | 38,7 $\pm$ 2,8                    | 0,035        | 82         | 0        | 152         | 3         |
| von Willebrand factor                                               | VWF            | 202112_at          | 38,6 $\pm$ 4,0                    | 0,045        | 91         | 0        | 507         | 11        |
| cysteine/tyrosine-rich 1                                            | CYYR1          | 228665_at          | 38,4 $\pm$ 3,9                    | 0,054        | 91         | 0        | 279         | 6         |
| chromosome 8 open reading frame 4                                   | C8orf4         | 218541_s_at        | 38,3 $\pm$ 4,7                    | 0,042        | 91         | 0        | 149         | 3         |
| endothelin receptor type B                                          | EDNRB          | 204273_at          | 34,9 $\pm$ 4,8                    | 0,038        | 91         | 22       | 370         | 7         |
| GTPase, IMAP family member 7                                        | GIMAP7         | 228071_at          | 34,7 $\pm$ 7,9                    | 0,072        | 100        | 22       | 345         | 47        |
| SPARC-like 1 (hevin)                                                | SPARCL1        | 200795_at          | 34,0 $\pm$ 4,9                    | 0,084        | 100        | 89       | 4263        | 91        |
| transmembrane 4 L six family member 18                              | TM4SF18        | 230061_at          | 32,7 $\pm$ 5,0                    | 0,047        | 91         | 22       | 224         | 6         |
| <b>endomucin</b>                                                    | <b>EMCN</b>    | <b>222885_at</b>   | <b>32,3 <math>\pm</math> 3,7</b>  | <b>0,036</b> | <b>91</b>  | <b>0</b> | <b>695</b>  | <b>13</b> |
| chemokine (C-X-C motif) ligand 2                                    | CXCL2          | 209774_x_at        | 32,1 $\pm$ 5,4                    | 0,056        | 82         | 0        | 142         | 4         |
| hepatocyte growth factor (hepapoietin A; scatter factor)            | HGF            | 209960_at          | 31,7 $\pm$ 4,2                    | 0,021        | 91         | 0        | 47          | 3         |
| GTPase, IMAP family member 4                                        | GIMAP4         | 219243_at          | 30,9 $\pm$ 5,8                    | 0,071        | 82         | 11       | 143         | 27        |
| <b>ankyrin repeat domain 29</b>                                     | <b>ANKRD29</b> | <b>229308_at</b>   | <b>29,0 <math>\pm</math> 5,6</b>  | <b>0,030</b> | <b>91</b>  | <b>0</b> | <b>116</b>  | <b>3</b>  |
| secreted frizzled-related protein 2                                 | SFRP2          | 223122_s_at        | 27,2 $\pm$ 9,8                    | 0,118        | 82         | 44       | 1457        | 50        |
| chemokine (C-X-C motif) ligand 12                                   | CXCL12         | 209687_at          | 26,9 $\pm$ 6,6                    | 0,054        | 91         | 22       | 1013        | 41        |
| CD93 molecule                                                       | CD93           | 202878_s_at        | 24,8 $\pm$ 4,0                    | 0,030        | 100        | 56       | 1262        | 93        |
| <b>olfactomedin-like 2A</b>                                         | <b>OLFML2A</b> | <b>213075_at</b>   | <b>24,4 <math>\pm</math> 3,7</b>  | <b>0,020</b> | <b>91</b>  | <b>0</b> | <b>388</b>  | <b>15</b> |
| collagen, type XIV, alpha 1                                         | COL14A1        | 212865_s_at        | 24,4 $\pm$ 4,1                    | 0,020        | 100        | 67       | 1216        | 50        |
| cadherin 5, type 2 (vascular endothelium)                           | CDH5           | 204677_at          | 24,2 $\pm$ 4,3                    | 0,053        | 91         | 0        | 202         | 11        |
| early B-cell factor 2                                               | EBF2           | 244885_at          | 24,0 $\pm$ 5,8                    | 0,046        | 91         | 0        | 135         | 7         |
| calcitonin receptor-like                                            | CALCRL         | 234996_at          | 23,9 $\pm$ 5,0                    | 0,051        | 91         | 22       | 221         | 7         |
| cell adhesion molecule with homology to L1CAM (close homolog of L1) | CHL1           | 204591_at          | 23,8 $\pm$ 7,1                    | 0,075        | 91         | 0        | 208         | 5         |
| GTPase, IMAP family member 2                                        | GIMAP2         | 232024_at          | 23,2 $\pm$ 7,5                    | 0,117        | 91         | 22       | 200         | 48        |
| platelet/endothelial cell adhesion molecule 1                       | PECAM1         | 208982_at          | 23,1 $\pm$ 4,0                    | 0,010        | 100        | 33       | 2355        | 161       |

|                                                                   |             |              |            |       |     |    |      |     |
|-------------------------------------------------------------------|-------------|--------------|------------|-------|-----|----|------|-----|
| actin, alpha 2, smooth muscle, aorta                              | ACTA2       | 200974_at    | 22,8 ± 4,1 | 0,041 | 100 | 67 | 1259 | 28  |
| major histocompatibility complex, class II, DR alpha              | HLA-DRA     | 208894_at    | 22,8 ± 9,0 | 0,081 | 100 | 33 | 1132 | 143 |
| C-type lectin domain family 14, member A                          | CLEC14A     | 226244_at    | 22,5 ± 4,5 | 0,059 | 91  | 0  | 139  | 3   |
| regulator of G-protein signaling 5                                | RGS5        | 209070_s_at  | 22,1 ± 3,9 | 0,042 | 91  | 0  | 694  | 19  |
| RUN domain containing 3B                                          | RUNDC3B     | 241703_at    | 20,7 ± 4,3 | 0,047 | 91  | 22 | 130  | 8   |
| multiple C2 domains, transmembrane 1                              | MCTP1       | 235740_at    | 20,6 ± 5,8 | 0,047 | 91  | 22 | 159  | 14  |
| chemokine (C-C motif) ligand 14 /// CCL14-CCL15 readthrough ///   | CCL14 ///   | 205392_s_at  | 20,5 ± 5,1 | 0,065 | 91  | 0  | 268  | 10  |
| chemokine (C-C motif) ligand 15                                   | CCL15... ** |              |            |       |     |    |      |     |
| insulin-like growth factor 1 (somatomedin C)                      | IGF1        | 209540_at    | 20,1 ± 3,6 | 0,012 | 100 | 22 | 525  | 22  |
| spondin 1, extracellular matrix protein                           | SPON1       | 213994_s_at  | 18,6 ± 5,8 | 0,060 | 91  | 11 | 461  | 26  |
| GTPase, IMAP family member 1                                      | GIMAP1      | 1552316_a_at | 18,2 ± 4,7 | 0,044 | 100 | 11 | 181  | 16  |
| microfibrillar associated protein 5                               | MFAP5       | 213764_s_at  | 17,8 ± 9,5 | 0,111 | 82  | 22 | 327  | 10  |
| platelet endothelial aggregation receptor 1                       | PEAR1       | 228618_at    | 17,6 ± 2,9 | 0,015 | 91  | 0  | 133  | 5   |
| serum deprivation response                                        | SDPR        | 222717_at    | 17,3 ± 5,0 | 0,073 | 100 | 33 | 322  | 55  |
| interleukin 33                                                    | IL33        | 209821_at    | 17,1 ± 3,0 | 0,051 | 91  | 11 | 223  | 10  |
| ribonuclease, RNase A family, 1 (pancreatic)                      | RNASE1      | 201785_at    | 16,9 ± 6,9 | 0,092 | 91  | 11 | 356  | 34  |
| collagen, type IV, alpha 1                                        | COL4A1      | 211980_at    | 16,6 ± 3,6 | 0,005 | 100 | 89 | 2141 | 85  |
| vestigial like 3 (Drosophila)                                     | VGLL3       | 227399_at    | 16,2 ± 2,9 | 0,033 | 91  | 22 | 196  | 10  |
| neuralized homolog 1B (Drosophila)                                | NEURL1B     | 225355_at    | 15,6 ± 3,9 | 0,031 | 91  | 22 | 470  | 31  |
| collagen, type XXI, alpha 1                                       | COL21A1     | 208096_s_at  | 15,3 ± 6,0 | 0,046 | 91  | 0  | 356  | 26  |
| serpin peptidase inhibitor, clade F (alpha-2 antiplasmin, pigment | SERPINF1    | 202283_at    | 15,2 ± 2,9 | 0,029 | 91  | 33 | 1477 | 81  |
| epithelium derived factor), member 1                              |             |              |            |       |     |    |      |     |
| tachykinin, precursor 1                                           | TAC1        | 206552_s_at  | 15,1 ± 4,8 | 0,061 | 91  | 22 | 181  | 9   |
| bone morphogenetic protein 5                                      | BMP5        | 205430_at    | 15,0 ± 3,7 | 0,051 | 91  | 0  | 208  | 13  |
| CD200 molecule                                                    | CD200       | 209583_s_at  | 14,9 ± 4,0 | 0,068 | 91  | 44 | 382  | 23  |
| podocalyxin-like                                                  | PODXL       | 201578_at    | 14,7 ± 3,5 | 0,020 | 100 | 56 | 853  | 71  |
| collagen, type IV, alpha 2                                        | COL4A2      | 211964_at    | 14,6 ± 3,9 | 0,016 | 100 | 22 | 698  | 60  |
| transgelin                                                        | TAGLN       | 205547_s_at  | 14,5 ± 4,1 | 0,042 | 91  | 33 | 360  | 17  |
| protein tyrosine phosphatase, receptor type, B                    | PTPRB       | 230250_at    | 14,4 ± 3,7 | 0,064 | 91  | 33 | 429  | 24  |
| TEK tyrosine kinase, endothelial                                  | TEK         | 206702_at    | 13,7 ± 4,0 | 0,048 | 91  | 0  | 157  | 8   |
| prostate androgen-regulated mucin-like protein 1                  | PARM1       | 225809_at    | 13,6 ± 4,0 | 0,024 | 91  | 0  | 327  | 20  |
| mannose receptor, C type 1                                        | MRC1        | 204438_at    | 13,3 ± 4,1 | 0,054 | 91  | 11 | 198  | 23  |
| regulator of calcineurin 2                                        | RCAN2       | 203498_at    | 13,2 ± 2,4 | 0,001 | 100 | 22 | 408  | 22  |
| prostaglandin E receptor 4 (subtype EP4)                          | PTGER4      | 204897_at    | 13,1 ± 4,2 | 0,041 | 100 | 56 | 474  | 52  |
| GTPase, IMAP family member 8                                      | GIMAP8      | 235306_at    | 12,9 ± 3,8 | 0,031 | 100 | 67 | 329  | 32  |
| GTPase, IMAP family member 6                                      | GIMAP6      | 229367_s_at  | 12,9 ± 3,9 | 0,031 | 82  | 11 | 285  | 33  |
| SRY (sex determining region Y)-box 7                              | SOX7        | 228698_at    | 12,8 ± 2,7 | 0,055 | 100 | 67 | 399  | 21  |
| lysophosphatidic acid receptor 6                                  | LPAR6       | 218589_at    | 12,8 ± 4,4 | 0,057 | 100 | 33 | 367  | 44  |
| guanylate cyclase 1, soluble, beta 3                              | GUCY1B3     | 203817_at    | 12,8 ± 4,5 | 0,036 | 91  | 22 | 397  | 16  |
| nitric oxide synthase trafficker                                  | NOSTRIN     | 226992_at    | 12,3 ± 3,7 | 0,048 | 82  | 0  | 125  | 11  |

|                                                                           |           |             |            |       |     |     |      |     |
|---------------------------------------------------------------------------|-----------|-------------|------------|-------|-----|-----|------|-----|
| thrombospondin, type I, domain containing 7A                              | THSD7A    | 214920_at   | 12,2 ± 3,9 | 0,031 | 100 | 0   | 81   | 7   |
| olfactomedin-like 3                                                       | OLFML3    | 218162_at   | 12,0 ± 2,8 | 0,001 | 100 | 89  | 577  | 40  |
| fatty acid binding protein 4, adipocyte                                   | FABP4     | 203980_at   | 12,0 ± 4,5 | 0,057 | 91  | 44  | 565  | 36  |
| CD74 molecule, major histocompatibility complex, class II invariant chain | CD74      | 209619_at   | 11,6 ± 4,6 | 0,073 | 100 | 56  | 298  | 37  |
| sprouty homolog 1, antagonist of FGF signaling (Drosophila)               | SPRY1     | 212558_at   | 11,5 ± 2,7 | 0,012 | 100 | 33  | 540  | 39  |
| phosphodiesterase 1A, calmodulin-dependent                                | PDE1A     | 208396_s_at | 11,4 ± 6,1 | 0,076 | 91  | 0   | 124  | 8   |
| phosphodiesterase 5A, cGMP-specific                                       | PDE5A     | 227088_at   | 10,8 ± 2,9 | 0,022 | 100 | 22  | 293  | 21  |
| glycoprotein (transmembrane) nmb                                          | GPNMB     | 201141_at   | 10,7 ± 4,2 | 0,066 | 100 | 100 | 1814 | 188 |
| membrane-spanning 4-domains, subfamily A, member 7                        | MS4A7     | 223343_at   | 10,6 ± 6,7 | 0,097 | 100 | 22  | 220  | 42  |
| arginine vasopressin receptor 1A                                          | AVPR1A    | 242680_at   | 10,5 ± 3,2 | 0,036 | 91  | 22  | 185  | 12  |
| secreted frizzled-related protein 1                                       | SFRP1     | 202037_s_at | 10,4 ± 5,8 | 0,057 | 91  | 22  | 554  | 33  |
| myosin VIIA and Rab interacting protein                                   | MYRIP     | 214156_at   | 9,7 ± 4,0  | 0,029 | 100 | 22  | 154  | 18  |
| tripartite motif containing 22                                            | TRIM22    | 213293_s_at | 9,6 ± 3,2  | 0,052 | 100 | 100 | 795  | 162 |
| plasminogen activator, tissue                                             | PLAT      | 201860_s_at | 9,6 ± 2,7  | 0,033 | 100 | 89  | 385  | 46  |
| matrix metalloproteinase 2                                                | MMP2      | 201069_at   | 9,2 ± 3,8  | 0,057 | 100 | 89  | 1272 | 133 |
| ATP-binding cassette, sub-family A (ABC1), member 8                       | ABCA8     | 204719_at   | 8,9 ± 3,1  | 0,070 | 100 | 100 | 487  | 40  |
| laminin, alpha 4                                                          | LAMA4     | 202202_s_at | 8,8 ± 3,6  | 0,066 | 100 | 89  | 699  | 65  |
| tetraspanin 7                                                             | TSPAN7    | 202242_at   | 8,6 ± 2,3  | 0,015 | 100 | 56  | 266  | 37  |
| caspase 4, apoptosis-related cysteine peptidase pseudogene                | LOC643733 | 240890_at   | 8,5 ± 3,1  | 0,038 | 100 | 44  | 138  | 14  |
| ring finger protein 125, E3 ubiquitin protein ligase                      | RNF125    | 235199_at   | 8,4 ± 3,5  | 0,033 | 91  | 11  | 171  | 27  |
| synaptopodin 2                                                            | SYNPO2    | 225721_at   | 8,4 ± 2,5  | 0,021 | 91  | 22  | 300  | 20  |
| multimerin 2                                                              | MMRN2     | 219091_s_at | 8,4 ± 2,6  | 0,032 | 91  | 67  | 294  | 30  |
| cytochrome P450, family 4, subfamily X, polypeptide 1                     | CYP4X1    | 227702_at   | 8,4 ± 3,7  | 0,023 | 100 | 56  | 129  | 17  |
| family with sequence similarity 198, member B                             | FAM198B   | 223204_at   | 8,3 ± 3,2  | 0,029 | 100 | 100 | 2073 | 254 |
| follistatin                                                               | FST       | 226847_at   | 8,3 ± 3,8  | 0,021 | 91  | 11  | 89   | 13  |
| slit homolog 2 (Drosophila)                                               | SLIT2     | 228850_s_at | 8,1 ± 2,5  | 0,031 | 100 | 22  | 191  | 20  |
| aquaporin 1 (Colton blood group)                                          | AQP1      | 209047_at   | 8,1 ± 3,4  | 0,051 | 100 | 100 | 1772 | 255 |
| synuclein, alpha interacting protein                                      | SNCAIP    | 219511_s_at | 8,1 ± 3,7  | 0,062 | 91  | 0   | 100  | 11  |
| ST8 alpha-N-acetyl-neuraminide alpha-2,8-sialyltransferase 4              | ST8SIA4   | 230836_at   | 8,0 ± 4,3  | 0,084 | 100 | 44  | 204  | 46  |
| solute carrier organic anion transporter family, member 2A1               | SLCO2A1   | 204368_at   | 8,0 ± 2,6  | 0,044 | 91  | 11  | 282  | 24  |
| scavenger receptor class A, member 5 (putative)                           | SCARA5    | 229839_at   | 7,9 ± 3,2  | 0,047 | 100 | 33  | 397  | 41  |
| CUGBP, Elav-like family member 2                                          | CELF2     | 202158_s_at | 7,8 ± 3,5  | 0,068 | 100 | 67  | 306  | 57  |
| endothelial cell surface expressed chemotaxis and apoptosis regulator     | ECSCR     | 227780_s_at | 7,7 ± 3,3  | 0,051 | 91  | 0   | 216  | 19  |
| family with sequence similarity 13, member C                              | FAM13C    | 1554547_at  | 7,6 ± 3,6  | 0,067 | 100 | 89  | 330  | 55  |
| interferon, alpha-inducible protein 27                                    | IFI27     | 202411_at   | 7,6 ± 2,9  | 0,042 | 100 | 78  | 507  | 55  |
| MDS1 and EVI1 complex locus                                               | MECOM     | 226420_at   | 7,5 ± 3,0  | 0,051 | 91  | 44  | 134  | 21  |
| ephrin-B2                                                                 | EFNB2     | 202668_at   | 7,3 ± 3,1  | 0,071 | 91  | 22  | 355  | 37  |
| secreted frizzled-related protein 4                                       | SFRP4     | 204052_s_at | 7,3 ± 3,1  | 0,042 | 100 | 78  | 391  | 52  |
| STEAP family member 4                                                     | STEAP4    | 225987_at   | 7,2 ± 3,6  | 0,070 | 100 | 78  | 759  | 175 |

|                                                                                                                          |                            |             |           |       |     |     |      |     |
|--------------------------------------------------------------------------------------------------------------------------|----------------------------|-------------|-----------|-------|-----|-----|------|-----|
| proline rich 16                                                                                                          | PRR16                      | 220014_at   | 6,9 ± 3,3 | 0,055 | 91  | 11  | 46   | 6   |
| fibrinogen-like 2                                                                                                        | FGL2                       | 204834_at   | 6,9 ± 3,4 | 0,078 | 100 | 89  | 292  | 55  |
| transmembrane and coiled-coil domain family 3                                                                            | TMCC3                      | 235146_at   | 6,8 ± 3,2 | 0,073 | 100 | 33  | 99   | 26  |
| pleckstrin homology-like domain, family B, member 2                                                                      | PHLDB2                     | 225688_s_at | 6,8 ± 3,5 | 0,080 | 100 | 100 | 704  | 92  |
| chloride intracellular channel 2                                                                                         | CLIC2                      | 213415_at   | 6,7 ± 2,4 | 0,026 | 100 | 56  | 226  | 25  |
| interferon-induced protein 44                                                                                            | IFI44                      | 214453_s_at | 6,7 ± 3,0 | 0,053 | 100 | 100 | 186  | 34  |
| fibulin 1                                                                                                                | FBLN1                      | 202995_s_at | 6,7 ± 2,4 | 0,055 | 100 | 100 | 880  | 93  |
| chromosome 1 open reading frame 115                                                                                      | C1orf115                   | 218546_at   | 6,7 ± 2,2 | 0,024 | 91  | 33  | 220  | 30  |
| A kinase (PRKA) anchor protein 12                                                                                        | AKAP12                     | 227530_at   | 6,6 ± 2,3 | 0,039 | 91  | 22  | 212  | 28  |
| melanoma cell adhesion molecule                                                                                          | MCAM                       | 210869_s_at | 6,6 ± 2,9 | 0,050 | 100 | 78  | 476  | 32  |
| chemokine (C-C motif) ligand 8                                                                                           | CCL8                       | 214038_at   | 6,5 ± 4,0 | 0,052 | 82  | 0   | 201  | 14  |
| nuclear receptor subfamily 4, group A, member 2                                                                          | NR4A2                      | 204622_x_at | 6,4 ± 2,2 | 0,005 | 100 | 100 | 967  | 132 |
| SAM domain and HD domain 1                                                                                               | SAMHD1                     | 234987_at   | 6,4 ± 2,8 | 0,052 | 100 | 100 | 690  | 122 |
| transmembrane protein 119                                                                                                | TMEM119                    | 227300_at   | 6,3 ± 2,8 | 0,079 | 100 | 78  | 154  | 20  |
| major histocompatibility complex, class II, DR beta 1 /// major histocompatibility complex, class II, DR beta 3 ///...** | HLA-DRB1 /// HLA-DRB3...** | 215193_x_at | 6,3 ± 3,6 | 0,085 | 100 | 100 | 1046 | 193 |
| guanylate binding protein 1, interferon-inducible                                                                        | GBP1                       | 231577_s_at | 6,3 ± 3,2 | 0,050 | 100 | 44  | 152  | 35  |
| laminin, beta 1                                                                                                          | LAMB1                      | 201505_at   | 6,2 ± 3,3 | 0,071 | 100 | 100 | 632  | 102 |
| phosphoglucomutase 5                                                                                                     | PGM5                       | 226303_at   | 6,2 ± 2,7 | 0,071 | 91  | 33  | 193  | 18  |
| twist homolog 1 (Drosophila)                                                                                             | TWIST1                     | 213943_at   | 6,2 ± 3,1 | 0,066 | 100 | 89  | 478  | 73  |
| leptin receptor                                                                                                          | LEPR                       | 209894_at   | 6,1 ± 2,2 | 0,005 | 100 | 100 | 1955 | 251 |
| protocadherin 17                                                                                                         | PCDH17                     | 228863_at   | 6,1 ± 2,6 | 0,030 | 100 | 56  | 169  | 32  |
| complement factor I                                                                                                      | CFI                        | 203854_at   | 6,1 ± 3,9 | 0,117 | 100 | 78  | 273  | 43  |
| doublecortin-like kinase 1                                                                                               | DCLK1                      | 229800_at   | 6,0 ± 3,3 | 0,064 | 100 | 67  | 212  | 30  |
| major histocompatibility complex, class II, DR beta 1 /// major histocompatibility complex, class II, DR beta 4 ///...** | HLA-DRB1 /// HLA-DRB4...** | 209312_x_at | 6,0 ± 3,8 | 0,089 | 100 | 100 | 1677 | 341 |
| ATPase, aminophospholipid transporter, class I, type 8B, member 1                                                        | ATP8B1                     | 226302_at   | 5,9 ± 2,5 | 0,040 | 100 | 100 | 772  | 116 |
| C1q and tumor necrosis factor related protein 2                                                                          | C1QTNF2                    | 223749_at   | 5,9 ± 3,4 | 0,086 | 82  | 67  | 164  | 30  |
| proteolipid protein 1                                                                                                    | PLP1                       | 210198_s_at | 5,9 ± 3,0 | 0,051 | 100 | 11  | 94   | 13  |
| activating transcription factor 3                                                                                        | ATF3                       | 202672_s_at | 5,7 ± 2,6 | 0,020 | 100 | 89  | 306  | 42  |
| complement factor D (adipsin)                                                                                            | CFD                        | 205382_s_at | 5,7 ± 2,9 | 0,057 | 100 | 89  | 930  | 162 |
| chromosome 4 open reading frame 32                                                                                       | C4orf32                    | 227856_at   | 5,6 ± 1,8 | 0,008 | 100 | 89  | 290  | 54  |
| neuropilin 1                                                                                                             | NRP1                       | 212298_at   | 5,5 ± 2,8 | 0,067 | 100 | 100 | 538  | 92  |
| cell adhesion molecule 1                                                                                                 | CADM1                      | 209031_at   | 5,5 ± 2,4 | 0,048 | 100 | 100 | 893  | 217 |
| ectonucleoside triphosphate diphosphohydrolase 1                                                                         | ENTPD1                     | 209473_at   | 5,5 ± 2,6 | 0,044 | 100 | 78  | 340  | 41  |
| early B-cell factor 3                                                                                                    | EBF3                       | 227242_s_at | 5,5 ± 2,7 | 0,043 | 100 | 33  | 166  | 30  |
| phosphatidic acid phosphatase type 2B                                                                                    | PPAP2B                     | 212226_s_at | 5,4 ± 2,9 | 0,078 | 100 | 78  | 447  | 90  |
| aryl hydrocarbon receptor                                                                                                | AHR                        | 202820_at   | 5,4 ± 2,7 | 0,050 | 100 | 89  | 378  | 103 |
| raftlin, lipid raft linker 1                                                                                             | RFTN1                      | 212646_at   | 5,3 ± 2,6 | 0,064 | 100 | 56  | 419  | 92  |
| dedicator of cytokinesis 4                                                                                               | DOCK4                      | 205003_at   | 5,3 ± 2,5 | 0,057 | 100 | 100 | 475  | 84  |

|                                                                                                 |                      |             |           |       |     |     |      |     |
|-------------------------------------------------------------------------------------------------|----------------------|-------------|-----------|-------|-----|-----|------|-----|
| coiled-coil domain containing 3                                                                 | CCDC3                | 223316_at   | 5,2 ± 2,1 | 0,031 | 100 | 44  | 637  | 125 |
| Rho GTPase activating protein 6                                                                 | ARHGAP6              | 206167_s_at | 5,1 ± 2,2 | 0,016 | 100 | 89  | 243  | 46  |
| nidogen 1                                                                                       | NID1                 | 202007_at   | 5,1 ± 2,4 | 0,027 | 100 | 100 | 415  | 58  |
| uncharacterised LOC100507463                                                                    | LOC100507463         | 1555852_at  | 5,1 ± 3,4 | 0,115 | 100 | 33  | 99   | 39  |
| collagen, type XXIV, alpha 1                                                                    | COL24A1              | 238732_at   | 5,0 ± 2,6 | 0,039 | 100 | 22  | 48   | 10  |
| tumor necrosis factor receptor superfamily, member 19                                           | TNFRSF19             | 227812_at   | 4,9 ± 2,5 | 0,063 | 100 | 67  | 242  | 50  |
| laminin, alpha 2                                                                                | LAMA2                | 216840_s_at | 4,9 ± 2,0 | 0,016 | 82  | 11  | 136  | 29  |
| ATPase, aminophospholipid transporter (APLT), class I, type 8A, member 1                        | ATP8A1               | 213106_at   | 4,8 ± 2,2 | 0,067 | 100 | 89  | 177  | 42  |
| zinc finger protein, multitype 2                                                                | ZFPM2                | 219778_at   | 4,7 ± 2,3 | 0,047 | 91  | 33  | 80   | 14  |
| aldo-keto reductase family 1, member C3                                                         | AKR1C3               | 209160_at   | 4,7 ± 2,3 | 0,038 | 100 | 100 | 508  | 80  |
| olfactomedin-like 1                                                                             | OLFML1               | 217525_at   | 4,6 ± 2,2 | 0,066 | 100 | 89  | 167  | 29  |
| thymocyte selection-associated high mobility group box                                          | TOX                  | 204529_s_at | 4,5 ± 2,5 | 0,048 | 100 | 78  | 101  | 22  |
| latrophilin 2                                                                                   | LPHN2                | 206953_s_at | 4,5 ± 2,6 | 0,078 | 100 | 100 | 401  | 75  |
| FERM domain containing 3                                                                        | FRMD3                | 230645_at   | 4,4 ± 2,0 | 0,053 | 91  | 56  | 94   | 17  |
| mesenchyme homeobox 2                                                                           | MEOX2                | 206201_s_at | 4,4 ± 1,9 | 0,005 | 100 | 100 | 643  | 151 |
| carboxypeptidase X (M14 family), member 2                                                       | CPXM2                | 226824_at   | 4,3 ± 2,1 | 0,049 | 91  | 44  | 296  | 68  |
| protein kinase, cGMP-dependent, type I                                                          | PRKG1                | 228396_at   | 4,3 ± 1,8 | 0,034 | 100 | 89  | 287  | 60  |
| cathepsin H                                                                                     | CTSH                 | 202295_s_at | 4,2 ± 2,4 | 0,065 | 100 | 67  | 294  | 55  |
| nephroblastoma overexpressed                                                                    | NOV                  | 214321_at   | 4,2 ± 2,4 | 0,069 | 100 | 100 | 719  | 121 |
| C-type lectin domain family 2, member B                                                         | CLEC2B               | 209732_at   | 4,1 ± 2,6 | 0,094 | 100 | 100 | 375  | 115 |
| myristoylated alanine-rich protein kinase C substrate                                           | MARCKS               | 201670_s_at | 4,1 ± 2,5 | 0,077 | 100 | 44  | 197  | 56  |
| nuclear receptor subfamily 2, group F, member 2                                                 | NR2F2                | 209120_at   | 4,0 ± 2,1 | 0,033 | 100 | 100 | 1387 | 267 |
| integrin, alpha 9                                                                               | ITGA9                | 227297_at   | 4,0 ± 2,2 | 0,064 | 100 | 100 | 309  | 68  |
| frizzled-related protein                                                                        | FRZB                 | 203697_at   | 4,0 ± 3,0 | 0,090 | 100 | 100 | 2105 | 457 |
| tight junction protein 2 (zona occludens 2)                                                     | TJP2                 | 202085_at   | 4,0 ± 1,9 | 0,025 | 100 | 33  | 373  | 86  |
| thrombospondin 1                                                                                | THBS1                | 235086_at   | 4,0 ± 2,3 | 0,019 | 100 | 89  | 245  | 52  |
| thrombospondin, type I, domain containing 4                                                     | THSD4                | 222835_at   | 3,9 ± 2,2 | 0,073 | 100 | 100 | 302  | 52  |
| glycine amidinotransferase (L-arginine:glycine amidinotransferase)                              | GATM                 | 203178_at   | 3,9 ± 2,7 | 0,072 | 100 | 67  | 130  | 37  |
| importin 11 /// leucine rich repeat containing 70                                               | IPO11 ///<br>LRRC70  | 238488_at   | 3,9 ± 2,1 | 0,055 | 100 | 78  | 129  | 27  |
| actin binding LIM protein 1                                                                     | ABLIM1               | 200965_s_at | 3,9 ± 2,2 | 0,054 | 100 | 100 | 655  | 157 |
| Kruppel-like factor 2 (lung)                                                                    | KLF2                 | 219371_s_at | 3,9 ± 1,7 | 0,000 | 100 | 100 | 1692 | 451 |
| multiple EGF-like-domains 6                                                                     | MEGF6                | 226869_at   | 3,5 ± 2,3 | 0,054 | 82  | 0   | 232  | 72  |
| nudix (nucleoside diphosphate linked moiety X)-type motif 4 /// nudix-type motif 4 pseudogene 1 | NUDT4 ///<br>NUDT4P1 | 212182_at   | 3,5 ± 2,4 | 0,052 | 100 | 44  | 60   | 20  |
| Rap guanine nucleotide exchange factor (GEF) 5                                                  | RAPGEF5              | 204681_s_at | 3,5 ± 3,1 | 0,129 | 100 | 100 | 378  | 117 |
| junctional adhesion molecule 2                                                                  | JAM2                 | 219213_at   | 3,5 ± 1,7 | 0,004 | 100 | 89  | 320  | 72  |
| butyrophilin, subfamily 3, member A2 /// butyrophilin, subfamily 3, member A3                   | BTN3A2 ///<br>BTN3A3 | 204820_s_at | 3,4 ± 2,2 | 0,062 | 100 | 100 | 486  | 165 |

|                                                                                |              |             |           |       |     |     |      |      |
|--------------------------------------------------------------------------------|--------------|-------------|-----------|-------|-----|-----|------|------|
| LIM domain only 2 (rhombotin-like 1)                                           | LMO2         | 204249_s_at | 3,4 ± 2,3 | 0,105 | 100 | 100 | 382  | 161  |
| Ca++-dependent secretion activator 2                                           | CADPS2       | 219572_at   | 3,4 ± 1,7 | 0,025 | 100 | 100 | 219  | 77   |
| major histocompatibility complex, class II, DP alpha 1                         | HLA-DPA1     | 211990_at   | 3,4 ± 2,3 | 0,089 | 100 | 100 | 1814 | 503  |
| butyrophilin, subfamily 3, member A2                                           | BTN3A2       | 209846_s_at | 3,3 ± 1,9 | 0,037 | 100 | 89  | 135  | 35   |
| acyl-CoA synthetase long-chain family member 5                                 | ACSL5        | 218322_s_at | 3,3 ± 1,8 | 0,035 | 100 | 56  | 94   | 25   |
| EPH receptor A4                                                                | EPHA4        | 227449_at   | 3,3 ± 1,9 | 0,045 | 100 | 100 | 181  | 52   |
| Fas (TNF receptor superfamily, member 6)                                       | FAS          | 204780_s_at | 3,3 ± 1,9 | 0,047 | 100 | 100 | 189  | 57   |
| protein kinase C, eta                                                          | PRKCH        | 218764_at   | 3,3 ± 1,8 | 0,022 | 100 | 100 | 298  | 87   |
| cysteine-rich secretory protein LCCL domain containing 1                       | CRISPLD1     | 223475_at   | 3,3 ± 2,2 | 0,042 | 100 | 100 | 1565 | 529  |
| butyrophilin, subfamily 3, member A3                                           | BTN3A3       | 204821_at   | 3,2 ± 2,0 | 0,047 | 100 | 78  | 109  | 31   |
| early growth response 2                                                        | EGR2         | 205249_at   | 3,2 ± 2,1 | 0,056 | 100 | 89  | 709  | 179  |
| platelet-derived growth factor receptor, beta polypeptide                      | PDGFRB       | 202273_at   | 3,2 ± 1,7 | 0,048 | 100 | 100 | 449  | 107  |
| tropomodulin 2 (neuronal)                                                      | TMOD2        | 226186_at   | 3,2 ± 1,7 | 0,017 | 82  | 0   | 154  | 44   |
| suppressor of cytokine signaling 2                                             | SOCS2        | 203373_at   | 3,2 ± 2,3 | 0,094 | 100 | 100 | 682  | 245  |
| transmembrane protein 204                                                      | TMEM204      | 219315_s_at | 3,1 ± 1,6 | 0,005 | 100 | 100 | 528  | 164  |
| apolipoprotein L domain containing 1                                           | APOLD1       | 221031_s_at | 3,1 ± 2,2 | 0,045 | 100 | 100 | 623  | 177  |
| uncharacterised LOC100287705 /// pleiotrophin                                  | LOC100287705 | 209465_x_at | 3,1 ± 2,4 | 0,122 | 100 | 100 | 401  | 129  |
|                                                                                | /// PTN      |             |           |       |     |     |      |      |
| collagen, type XII, alpha 1                                                    | COL12A1      | 225664_at   | 3,1 ± 2,4 | 0,112 | 100 | 100 | 3138 | 1059 |
| protein tyrosine phosphatase, receptor type, G                                 | PTPRG        | 1569323_at  | 3,1 ± 1,6 | 0,003 | 100 | 100 | 215  | 58   |
| spectrin repeat containing, nuclear envelope 2                                 | SYNE2        | 202761_s_at | 3,1 ± 2,0 | 0,070 | 100 | 100 | 466  | 168  |
| activated leukocyte cell adhesion molecule                                     | ALCAM        | 201952_at   | 3,0 ± 2,0 | 0,063 | 100 | 100 | 340  | 116  |
| C1q and tumor necrosis factor related protein 7                                | C1QTNF7      | 239349_at   | 3,0 ± 1,9 | 0,042 | 100 | 100 | 412  | 127  |
| retinoic acid receptor responder (tazarotene induced) 3                        | RARRES3      | 204070_at   | 3,0 ± 1,9 | 0,065 | 100 | 89  | 145  | 56   |
| pyruvate dehydrogenase kinase, isozyme 4                                       | PDK4         | 225207_at   | 3,0 ± 2,4 | 0,124 | 100 | 100 | 1092 | 395  |
| integrin, alpha 6                                                              | ITGA6        | 215177_s_at | 3,0 ± 1,8 | 0,007 | 100 | 100 | 191  | 60   |
| microtubule-associated protein 1B                                              | MAP1B        | 212233_at   | 3,0 ± 1,7 | 0,022 | 100 | 100 | 663  | 232  |
| tissue factor pathway inhibitor (lipoprotein-associated coagulation inhibitor) | TFPI         | 213258_at   | 3,0 ± 2,1 | 0,106 | 100 | 100 | 482  | 142  |
| prostaglandin F2 receptor negative regulator                                   | PTGFRN       | 224937_at   | 2,9 ± 2,2 | 0,125 | 100 | 100 | 317  | 102  |
| lysophosphatidylcholine acyltransferase 2                                      | LPCAT2       | 227889_at   | 2,9 ± 2,0 | 0,053 | 100 | 100 | 169  | 66   |
| guanylate binding protein 3                                                    | GBP3         | 223434_at   | 2,9 ± 2,7 | 0,124 | 100 | 100 | 240  | 89   |
| Rho guanine nucleotide exchange factor (GEF) 3                                 | ARHGEF3      | 218501_at   | 2,9 ± 1,7 | 0,033 | 100 | 100 | 318  | 111  |
| chromosome 10 open reading frame 116                                           | C10orf116    | 203571_s_at | 2,9 ± 1,7 | 0,018 | 100 | 100 | 1609 | 514  |
| potassium channel tetramerisation domain containing 12                         | KCTD12       | 212192_at   | 2,9 ± 1,8 | 0,052 | 100 | 100 | 2133 | 719  |
| ral guanine nucleotide dissociation stimulator-like 1                          | RGL1         | 209568_s_at | 2,8 ± 1,6 | 0,040 | 100 | 100 | 664  | 244  |
| XIAP associated factor 1                                                       | XAF1         | 228617_at   | 2,8 ± 1,8 | 0,040 | 100 | 100 | 501  | 183  |
| growth arrest-specific 6                                                       | GAS6         | 202177_at   | 2,8 ± 1,7 | 0,008 | 100 | 44  | 443  | 151  |
| CD24 molecule                                                                  | CD24         | 216379_x_at | 2,8 ± 2,3 | 0,111 | 100 | 100 | 643  | 250  |
| NKF3 kinase family member                                                      | PEAK1        | 225913_at   | 2,8 ± 1,9 | 0,074 | 100 | 67  | 581  | 216  |

|                                                                                  |                              |             |           |       |     |     |      |      |
|----------------------------------------------------------------------------------|------------------------------|-------------|-----------|-------|-----|-----|------|------|
| endothelial PAS domain protein 1 /// uncharacterised LOC100652809                | EPAS1 ///<br>LOC100652809    | 200878_at   | 2,8 ± 1,6 | 0,050 | 100 | 100 | 2390 | 761  |
| hydroxysteroid (17-beta) dehydrogenase 11                                        | HSD17B11                     | 217989_at   | 2,8 ± 2,2 | 0,092 | 100 | 100 | 418  | 141  |
| insulin-like growth factor binding protein 6                                     | IGFBP6                       | 203851_at   | 2,8 ± 1,9 | 0,040 | 100 | 100 | 1685 | 477  |
| lipoma HMGIC fusion partner                                                      | LHFP                         | 218656_s_at | 2,7 ± 1,6 | 0,032 | 100 | 100 | 2503 | 913  |
| TNF receptor-associated factor 5                                                 | TRAF5                        | 204352_at   | 2,7 ± 1,8 | 0,066 | 100 | 100 | 208  | 72   |
| calcium channel, voltage-dependent, alpha 2/delta subunit 1                      | CACNA2D1                     | 227623_at   | 2,7 ± 2,0 | 0,077 | 100 | 100 | 329  | 127  |
| DEAD (Asp-Glu-Ala-Asp) box polypeptide 60-like                                   | DDX60L                       | 228152_s_at | 2,7 ± 2,4 | 0,121 | 100 | 33  | 224  | 144  |
| distal-less homeobox 6                                                           | DLX6                         | 239309_at   | 2,7 ± 1,5 | 0,023 | 100 | 67  | 64   | 27   |
| family with sequence similarity 176, member C                                    | FAM176C                      | 227188_at   | 2,7 ± 1,5 | 0,023 | 100 | 100 | 159  | 56   |
| frizzled family receptor 4                                                       | FZD4                         | 218665_at   | 2,6 ± 1,6 | 0,041 | 100 | 100 | 302  | 125  |
| thrombospondin 4                                                                 | THBS4                        | 204776_at   | 2,6 ± 2,2 | 0,115 | 100 | 100 | 2443 | 1018 |
| long intergenic non-protein coding RNA 341                                       | LINC00341                    | 219563_at   | 2,6 ± 1,7 | 0,025 | 100 | 100 | 897  | 356  |
| leucine-rich repeat kinase 2                                                     | LRRK2                        | 229584_at   | 2,6 ± 2,6 | 0,124 | 100 | 100 | 288  | 155  |
| mitogen-activated protein kinase kinase kinase 1, E3 ubiquitin protein<br>ligase | MAP3K1                       | 225927_at   | 2,5 ± 1,8 | 0,088 | 100 | 100 | 449  | 186  |
| microphthalmia-associated transcription factor                                   | MITF                         | 226066_at   | 2,5 ± 1,9 | 0,098 | 100 | 100 | 269  | 105  |
| DIRAS family, GTP-binding RAS-like 3                                             | DIRAS3                       | 215506_s_at | 2,5 ± 1,6 | 0,072 | 100 | 100 | 146  | 59   |
| A kinase (PRKA) anchor protein 2 /// PALM2-AKAP2 readthrough                     | AKAP2 ///<br>PALM2-<br>AKAP2 | 226694_at   | 2,5 ± 1,7 | 0,052 | 100 | 100 | 1663 | 601  |
| zinc finger protein 36, C3H type, homolog (mouse)                                | ZFP36                        | 201531_at   | 2,5 ± 1,7 | 0,042 | 100 | 100 | 991  | 386  |
| Kruppel-like factor 11                                                           | KLF11                        | 218486_at   | 2,4 ± 1,6 | 0,024 | 100 | 100 | 351  | 136  |
| ribosomal protein S6 kinase, 90kDa, polypeptide 2                                | RPS6KA2                      | 212912_at   | 2,4 ± 1,8 | 0,074 | 100 | 100 | 260  | 99   |
| estrogen receptor 1                                                              | ESR1                         | 205225_at   | 2,4 ± 1,7 | 0,048 | 100 | 100 | 365  | 146  |
| distal-less homeobox 5                                                           | DLX5                         | 213707_s_at | 2,4 ± 1,5 | 0,015 | 100 | 89  | 229  | 117  |
| cytochrome P450, family 1, subfamily B, polypeptide 1                            | CYP1B1                       | 202437_s_at | 2,4 ± 1,9 | 0,089 | 100 | 100 | 1715 | 729  |
| heat shock 70kDa protein 1A /// heat shock 70kDa protein 1B                      | HSPA1A ///<br>HSPA1B         | 200799_at   | 2,4 ± 1,4 | 0,000 | 100 | 100 | 7214 | 2835 |
| methyltransferase like 7A                                                        | METTL7A                      | 207761_s_at | 2,4 ± 1,6 | 0,011 | 100 | 100 | 2700 | 1083 |
| major histocompatibility complex, class I, E                                     | HLA-E                        | 200904_at   | 2,3 ± 1,6 | 0,051 | 100 | 100 | 1349 | 503  |
| complement factor H /// complement factor H-related 1                            | CFH /// CFHR1                | 215388_s_at | 2,3 ± 1,9 | 0,099 | 100 | 100 | 1316 | 595  |
| long intergenic non-protein coding RNA 597                                       | LINC00597                    | 208109_s_at | 2,3 ± 1,6 | 0,064 | 100 | 100 | 139  | 54   |
| family with sequence similarity 171, member B                                    | FAM171B                      | 227370_at   | 2,2 ± 1,7 | 0,082 | 100 | 100 | 387  | 174  |
| STAM binding protein-like 1                                                      | STAMBPL1                     | 227607_at   | 2,2 ± 1,6 | 0,052 | 100 | 100 | 251  | 114  |
| RNA binding motif, single stranded interacting protein 3                         | RBMS3                        | 238447_at   | 2,2 ± 1,7 | 0,011 | 100 | 100 | 915  | 374  |
| KIAA1462                                                                         | KIAA1462                     | 213316_at   | 2,2 ± 1,6 | 0,056 | 100 | 100 | 322  | 149  |
| acetyl-CoA carboxylase beta                                                      | ACACB                        | 49452_at    | 2,1 ± 1,5 | 0,027 | 100 | 100 | 221  | 97   |
| homeobox D8                                                                      | HOXD8                        | 231906_at   | 2,1 ± 1,6 | 0,066 | 100 | 100 | 363  | 204  |
| dishevelled associated activator of morphogenesis 2                              | DAAM2                        | 212793_at   | 2,1 ± 1,4 | 0,012 | 100 | 100 | 530  | 287  |

|                                                                            |           |              |           |       |     |     |      |     |
|----------------------------------------------------------------------------|-----------|--------------|-----------|-------|-----|-----|------|-----|
| uncharacterised LOC284454                                                  | LOC284454 | 1555847_a_at | 2,1 ± 1,6 | 0,090 | 100 | 100 | 346  | 204 |
| prostaglandin-endoperoxide synthase 1                                      | PTGS1     | 215813_s_at  | 2,1 ± 1,5 | 0,073 | 100 | 100 | 314  | 155 |
| poly (ADP-ribose) polymerase family, member 12                             | PARP12    | 218543_s_at  | 2,1 ± 1,5 | 0,047 | 100 | 100 | 219  | 107 |
| ankyrin 2, neuronal                                                        | ANK2      | 202920_at    | 2,1 ± 1,8 | 0,115 | 100 | 100 | 1128 | 481 |
| runt-related transcription factor 1; translocated to, 1 (cyclin D-related) | RUNX1T1   | 228827_at    | 2,1 ± 1,5 | 0,035 | 100 | 100 | 517  | 251 |
| v-ets erythroblastosis virus E26 oncogene homolog 2 (avian)                | ETS2      | 201328_at    | 2,1 ± 1,5 | 0,067 | 100 | 100 | 546  | 234 |
| v-maf musculoaponeurotic fibrosarcoma oncogene homolog F (avian)           | MAFF      | 36711_at     | 2,1 ± 1,4 | 0,030 | 100 | 100 | 1351 | 647 |
| CDC14 cell division cycle 14 homolog B (S. cerevisiae)                     | CDC14B    | 221556_at    | 2,1 ± 1,4 | 0,048 | 100 | 100 | 452  | 207 |
| SAM and SH3 domain containing 1                                            | SASH1     | 213236_at    | 2,1 ± 1,4 | 0,003 | 100 | 67  | 561  | 273 |
| nucleoredoxin                                                              | NXN       | 219489_s_at  | 2,1 ± 1,4 | 0,033 | 100 | 100 | 411  | 211 |
| transmembrane protein 30B                                                  | TMEM30B   | 213285_at    | 2,0 ± 1,3 | 0,020 | 100 | 100 | 488  | 241 |
| FYVE, RhoGEF and PH domain containing 5                                    | FGD5      | 226985_at    | 2,0 ± 1,5 | 0,046 | 100 | 100 | 344  | 168 |
